# Supplementary material
Source: PubMed Central journal article supplement (PMC3193251)
Supplement: 1114228108_pnas.1114228108_SI.pdf [file 1114228108_pnas.1114228108_SI.pdf]

# Supporting Information

Van de Velde et al. 10.1073/pnas.1114228108

## SI Text

**Antibodies and Reagents.** Reagents used in this study were obtained from the following sources: Rabbit polyclonal antibody to HIF-1 $\alpha$  from Cayman Chemical (10006421); rabbit polyclonal antibody to HSP90 from Santa Cruz Biotechnology (sc-79470); mouse monoclonal antibody to tubulin from Millipore (05-829); anti-FLAG M2 agarose from Sigma (A2220); rabbit polyclonal antibodies to phospho-S6 (Cell Signaling; 4857); rabbit monoclonal antibody to cleaved caspase-3 (Cell Signaling; 9664); phospho-Akt (T308) (Cell Signaling; 4056); phospho-Akt (S473) (Cell Signaling; 9271); phospho-PKA substrate (RRXpS/T) (Cell Signaling; 9621); mouse monoclonal antibody to S6 (Cell Signaling; 2317); phospho (T1462) TSC2 (Cell Signaling; 3617); guinea pig polyclonal antibody to insulin (Zymed; 180067). Dimethylallylglycine (DMOG) from Frontier Scientific (D1070); rapamycin from LC laboratories (R-5000); forskolin from Calbiochem; PP242 from Sigma (P0037); trypan blue solution from Sigma (T8154); LY294002 from Cell Signaling Technology (9901);

H89 from Calbiochem (371963); streptozotocin from Sigma (S0130); cycloheximide from Calbiochem (239674).

Plasmids expressing cDNAs for HA-HIF-1 $\alpha$  P402A/P564A (18955) were purchased from Addgene. HRE-LUC reporter construct was generously provided by Randall Johnson (UCSD). We constructed RNAi-adenoviruses expressing U6 promoter driven short hairpin RNAs directed against mouse and rat HIF-1 $\alpha$  (GGGCAGTCAATGGATGAGAGTG) cDNAs.

**Lactate and ATP Measurement.** For lactate measurements, batches of 50 size-matched primary islets were cultured in RPMI medium without phenol red. After the indicated forskolin exposures, the islets were placed in fresh medium and incubated for 4 h at 37 °C. For ATP measurements, batches of 50 size-matched primary islets were exposed to forskolin, harvested, and boiled in 200  $\mu$ l Tris-HCl pH 7.75, 4 mM EDTA for four minutes.

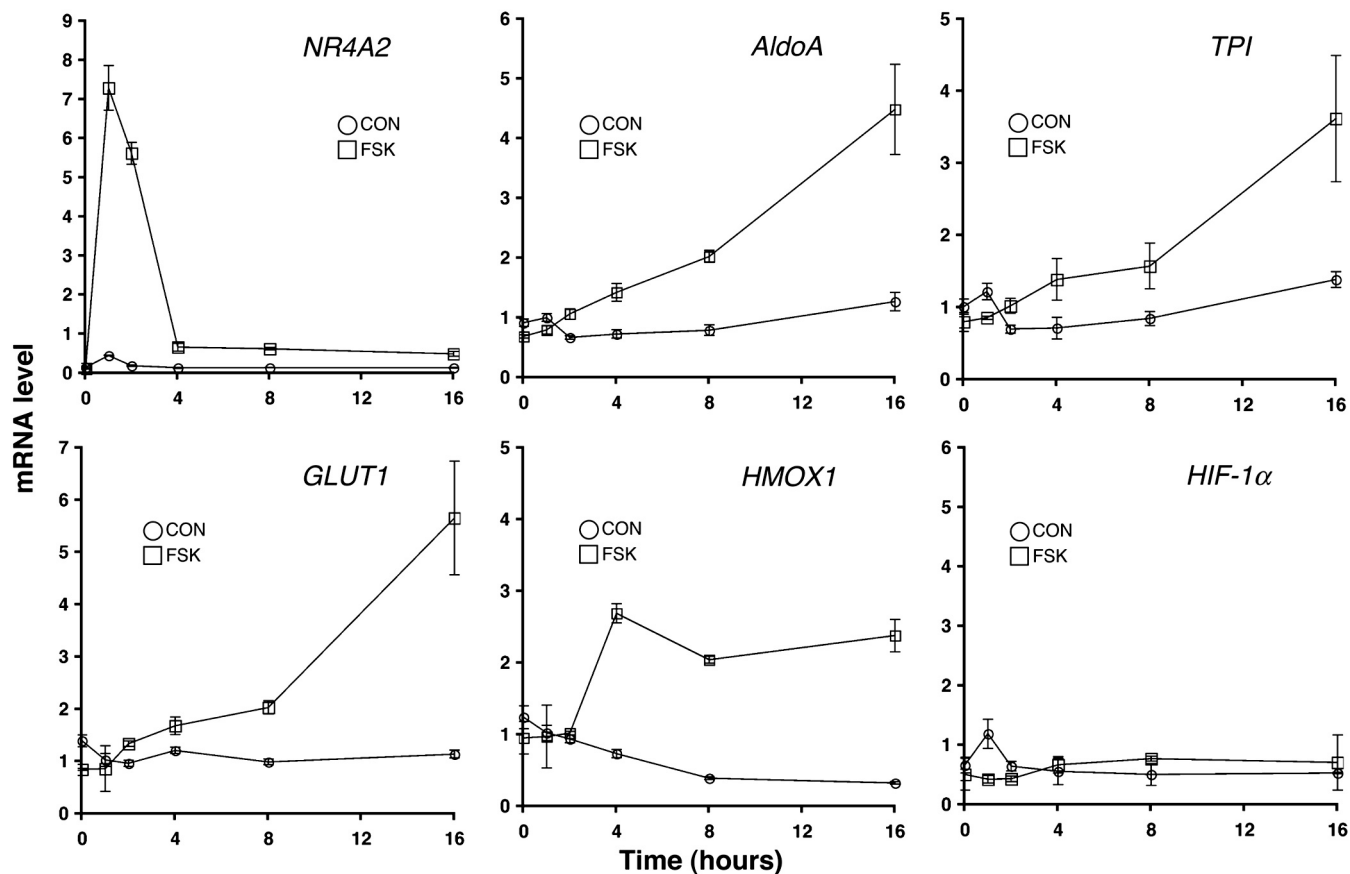

Fig. S1. Q-PCR analysis of early (NR4A2) and late (AldoA, TPI, Glut 1, HMOX1) cAMP inducible genes identified in gene profiling assays of INS-1 cells exposed to FSK. Effect of FSK exposure for different times shown.





**Table S1. Oligonucleotides used for ChIP analysis**

| Target enhancer region (rat) |     |                            |
|------------------------------|-----|----------------------------|
| <i>NR4A2</i>                 | Fw  | 5'-GCGCAGACTTTAGGTGCATG-3' |
|                              | Rev | 5'-TGTTTATGTGGCTCGCGCTG-3' |
| <i>GLUT1</i>                 | Fw  | 5'-ACAGGCGTGCTGGCTGACAC-3' |
|                              | Rev | 5'-TGATGATTCGGGCAAGTGCC-3' |
| <i>HMOX1</i>                 | Fw  | 5'-TGGCAAGAAGGAGAGCGGAC-3' |
|                              | Rev | 5'-GTCCACAGAAGGAACGTGTC-3' |

**Table S2. Oligonucleotides used for Q-PCR analysis**

| Target cDNA    | Sequence |                             |
|----------------|----------|-----------------------------|
| Actin          | Fw       | 5'-TCTACAATGAGCTGCGTGTG-3'  |
|                | Rev      | 5'-GGTCTCAAACATGATCTGGG-3'  |
| L32            | Fw       | 5'-GAAAACCAAGCACATGCTGC-3'  |
|                | Rev      | 5'-TTGTTGCACATCAGCAGCAC-3'  |
| NR4A2          | Fw       | 5'-CTACTGTCCAACTGTTGG-3'    |
|                | Rev      | 5'-GGTAAGGTGTCCAGGAAAAG-3'  |
| IRS2           | Fw       | 5'-TCTCCAAAGTGGCTACAA-3'    |
|                | Rev      | 5'-TCATGGGCATGTAGCCATCA-3'  |
| ATF3           | Fw       | 5'-AAGGAAGAGCTGAGATTGCG-3'  |
|                | Rev      | 5'-CTCAGACTTGTTGACTGACA-3'  |
| CRY2           | Fw       | 5'-GAAGCAGATCTACCAACAGC-3'  |
|                | Rev      | 5'-CACAGGGTGACTGAGGTCTT-3'  |
| HIF-1 $\alpha$ | Fw       | 5'-ACCACTGCTAAGGCATCAGC-3'  |
|                | Rev      | 5'-GCTCCTGGATGAGCTTTGT-3'   |
| GLUT1          | Fw       | 5'-GCTTATGGGTTTCTCAAAC-3'   |
|                | Rev      | 5'-GTGACACCTCCCCACATAC-3'   |
| HMOX1          | Fw       | 5'-AGGCTTTAAGCTGGTATGG-3'   |
|                | Rev      | 5'-ATACCAGAAGGCCATGTCCT-3'  |
| Aldolase A     | Fw       | 5'-GAAGAAGGAGAACCTGAAGG-3'  |
|                | Rev      | 5'-ACAGAGATTCAGTGGCTGCG-3'  |
| TPI1           | Fw       | 5'-AGGAAGTACACGAGAAGCTC-3'  |
|                | Rev      | 5'-CTCCAGTCACAGAACCTCCA-3'  |
| PGK1           | Fw       | 5'-GACTGTGGTACTGAGAGCAG-3'  |
|                | Rev      | 5'-CCTGGCAAAGGCTTCCATT-3'   |
| PDK1           | Fw       | 5'-CTGAGGAAGATCGACAGACT-3'  |
|                | Rev      | 5'-GATATGGGCAATCCGTAACC-3'  |
| LDHA           | Fw       | 5'-GTGCATCCCATTTCCACCAT-3'  |
|                | Rev      | 5'-GAGTCAGTGTACCTTCACA-3'   |
| BNIP3          | Fw       | 5'-GCGCACAGCTACTCTCAGCA-3'  |
|                | Rev      | 5'-GTCAGACGCCTTCCAATGTAG-3' |
